# Supplementary material for: Botanical Origin Differentiation of Malaysian Stingless Bee Honey Produced by Heterotrigona itama and Geniotrigona thoracica Using Chemometrics
Source: MDPI journal article supplement (doi:10.3390/molecules26247628), 2021-12-16
Supplement: s1 [file s1]

## Supplementary Materials

**Table S1:**  $^{13}\text{C}$  chemical shifts of sugars in each model compound.

| Sugar                                      | Tautomer % | C1   | C2    | C3   | C4   | C5   | C6   | C1'  | C2'   | C3'  | C4'  | C5'  | C6'  |
|--------------------------------------------|------------|------|-------|------|------|------|------|------|-------|------|------|------|------|
| Glucose                                    |            |      |       |      |      |      |      |      |       |      |      |      |      |
| $\alpha$ -D-glucopyranose ( $\alpha$ -GP)  | 37.23      | 92.7 | 72.1  | 73.4 | 70.2 | 72.0 | 61.2 | -    | -     | -    | -    | -    | -    |
| $\beta$ -D-glucopyranose ( $\beta$ -GP)    | 62.77      | 96.5 | 74.7  | 76.4 | 70.3 | 76.6 | 61.4 | -    | -     | -    | -    | -    | -    |
| Fructose                                   |            |      |       |      |      |      |      |      |       |      |      |      |      |
| $\alpha$ -D-fructopyranose ( $\alpha$ -FP) | 3.64       | 65.8 | -     | -    | 70.6 | 71.1 | 61.7 | -    | -     | -    | -    | -    | -    |
| $\beta$ -D-fructopyranose ( $\beta$ -FP)   | 69.18      | 64.5 | 98.7  | 68.1 | 70.3 | 69.8 | 64.0 | -    | -     | -    | -    | -    | -    |
| $\alpha$ -D-fructofuranose ( $\alpha$ -FF) | 5.97       | 63.5 | 105.0 | 82.6 | 76.6 | 81.9 | 61.7 | -    | -     | -    | -    | -    | -    |
| $\beta$ -D-fructofuranose ( $\beta$ -FF)   | 21.21      | 63.2 | 102.1 | 76.0 | 75.1 | 81.3 | 63.0 | -    | -     | -    | -    | -    | -    |
| Sucrose                                    | -          | 92.8 | 71.7  | 73.2 | 69.8 | 73.0 | 60.7 | 61.9 | 104.3 | 77.0 | 74.6 | 82.0 | 63.0 |

**Table S2:** Assignment of the carbon resonances and comparison of the measured amount (% , g/100 g) to that of the actual weight amount of each tautomer in the  $^{13}\text{C}$  NMR spectra of isoglucose.

| Sugar                                      | Tautomer % | Chemical shift                      | Average integration value | Actual concentration | Concentration determined by $^{13}\text{C}$ NMR | Similarity (%) |
|--------------------------------------------|------------|-------------------------------------|---------------------------|----------------------|-------------------------------------------------|----------------|
| Glucose                                    |            |                                     |                           |                      |                                                 |                |
| $\alpha$ -D-glucopyranose ( $\alpha$ -GP)  | 39.17      | 72.0, 72.1, 73.4, 92.7              | 0.2350                    | 17.63                | 18.08                                           | 97.45          |
| $\beta$ -D-glucopyranose ( $\beta$ -GP)    | 60.83      | 74.7, 96.5                          | 0.3650                    | 27.37                | 28.09                                           | 97.37          |
| Fructose                                   |            |                                     |                           |                      |                                                 |                |
| $\alpha$ -D-fructopyranose ( $\alpha$ -FP) | 3.82       | 65.8, 70.7, 71.1                    | 0.0268                    | 2.10                 | 2.06                                            | 98.10          |
| $\beta$ -D-fructopyranose ( $\beta$ -FP)   | 69.13      | 64.5, 68.2, 69.8, 98.7              | 0.4850                    | 38.02                | 37.21                                           | 97.87          |
| $\alpha$ -D-fructofuranose ( $\alpha$ -FF) | 5.20       | 63.5, 81.9, 82.6, 105.0             | 0.0345                    | 2.86                 | 2.80                                            | 97.90          |
| $\beta$ -D-fructofuranose ( $\beta$ -FF)   | 21.85      | 63.0, 63.3, 75.1, 76.0, 81.3, 102.1 | 0.1533                    | 12.02                | 11.76                                           | 97.84          |

**Table S3:** Assignment of the carbon resonances and comparison of the measured amount (% g/100 g) to that of the actual weight amount of each tautomer in the <sup>13</sup>C NMR spectra of artificial honey.

| Sugar                     | Tautomer % | Chemical shift                      | Average integration value | Actual concentration | Concentration determined by <sup>13</sup> C NMR | Similarity (%) |
|---------------------------|------------|-------------------------------------|---------------------------|----------------------|-------------------------------------------------|----------------|
| Glucose                   |            |                                     |                           |                      |                                                 |                |
| α-D-glucopyranose (α-GP)  | 38.46      | 72.0, 72.1, 73.4                    | 0.15                      | 15.87                | 17.02                                           | 92.75          |
| β-D-glucopyranose (β-GP)  | 61.64      | 96.5                                | 0.24                      | 25.44                | 27.28                                           | 92.77          |
| Fructose                  |            |                                     |                           |                      |                                                 |                |
| α-D-fructopyranose (α-FP) | 2.51       | 65.8                                | 0.0106                    | 1.27                 | 1.21                                            | 95.28          |
| β-D-fructopyranose (β-FP) | 70.87      | 64.5, 68.2, 98.7                    | 0.3000                    | 35.99                | 34.05                                           | 94.61          |
| α-D-fructofuranose (α-FF) | 5.32       | 63.5, 82.6, 105.0                   | 0.0225                    | 2.70                 | 2.56                                            | 94.81          |
| β-D-fructofuranose (β-FF) | 21.31      | 63.3, 75.1, 76.0, 81.3, 102.1       | 0.0902                    | 10.82                | 10.24                                           | 94.64          |
| Sucrose                   | -          | 60.7, 71.6, 73.0, 73.2, 77.0, 104.3 | 0.0357                    | 7.94                 | 7.69                                            | 96.85          |

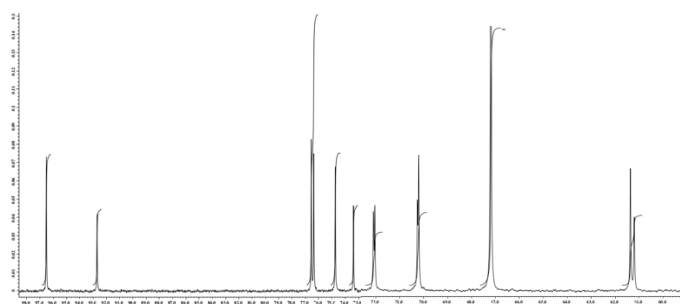

Figure S1a: Glucose.

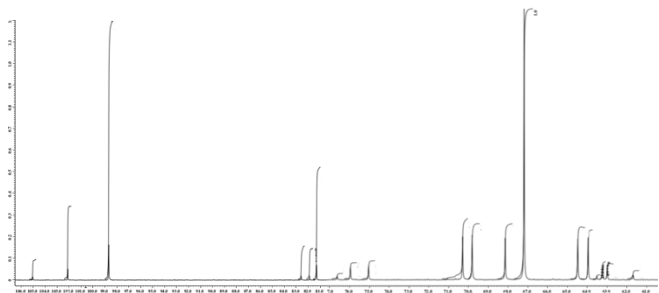

Figure S1b: Fructose.

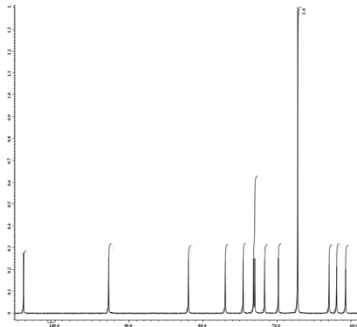

Figure S1c: Sucrose.

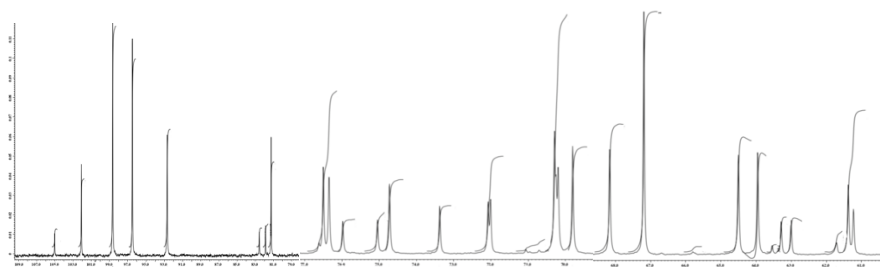

**Figure S2:** Isoglucose.

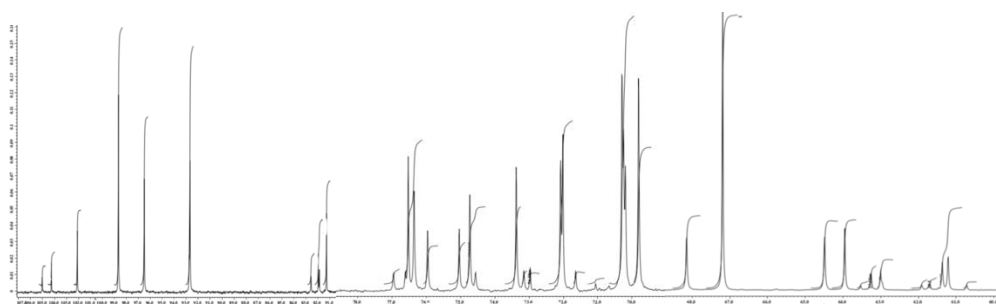

**Figure S3:** Artificial honey mixture.

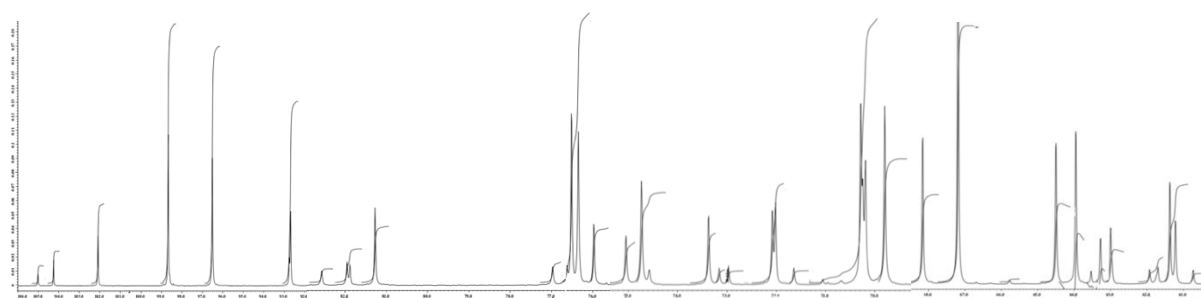

A

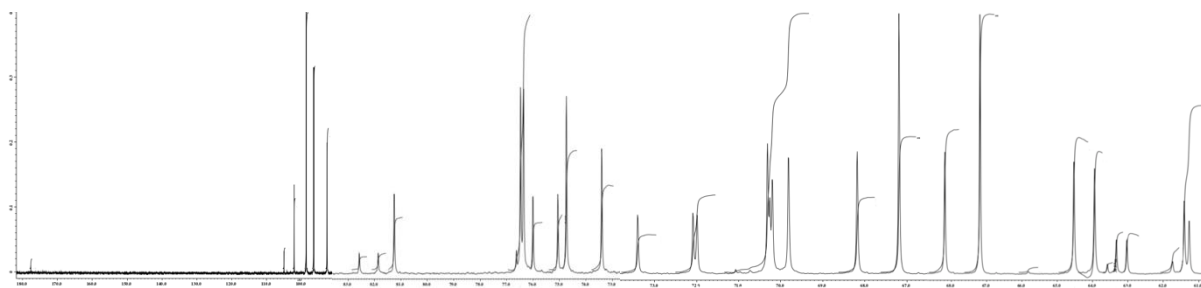

B

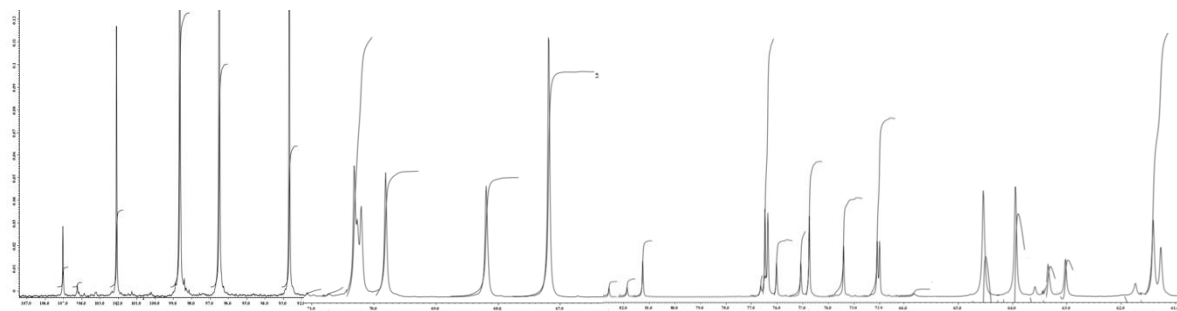

C

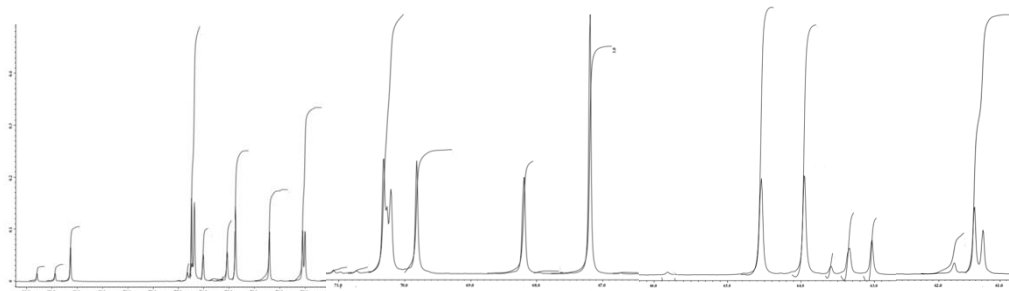

D

**Figure S4:**  $^{13}\text{C}$  NMR spectra of stingless bee honey samples originating from (A-B) honeydew and (C-D) blossom.

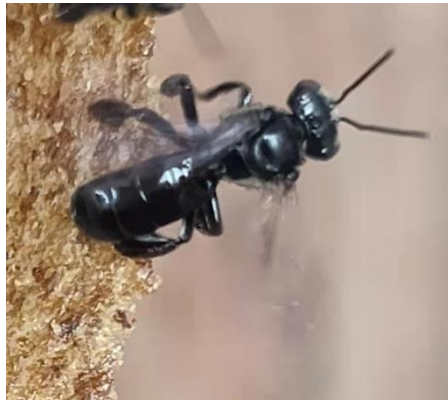

**Figure S5a:** *Heterotrigona itama*.

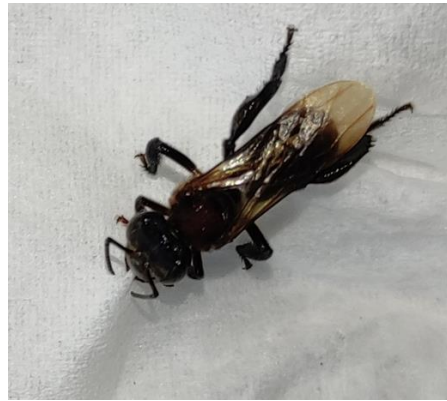

**Figure S5b:** *Geniotrigona thoracica*.

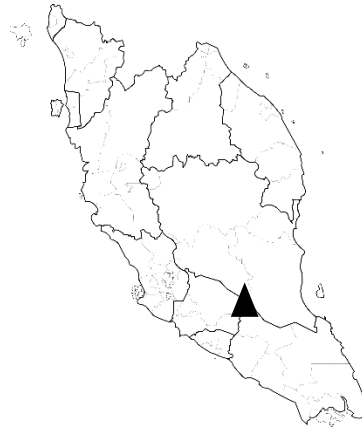

**Figure S6.** The location of honey sample collection in peninsular Malaysia.
